# Supplementary material for: Thermal requirements, fertility life table and biological parameters of Cleruchoides noackae (Hymenoptera: Mymaridae) at different temperatures
Source: PeerJ. 2023 Mar 13;11:e14911. doi: 10.7717/peerj.14911 (PMC10019329; doi:10.7717/peerj.14911)
Supplement: Supplemental Information 1 [file peerj-11-14911-s001.xlsx]

## Sheet: Plan1
Temperature	Replication	Time female (h)	Time male (h)
15	1	72	48
15	2	72	96
15	3	24	48
15	4	24	24
15	5	96	72
15	6	48	96
15	7	72	72
15	8	24	144
15	9	72	24
15	10	24	96
15	11	48	24
15	12	24	24
15	13	24	48
15	14	48	72
15	15	48	48
15	16	48	48
15	17	24	72
15	18	72	48
15	19	48	24
15	20	24	24
15	21	120	24
15	22	24	72
15	23	48	48
15	24	24	24
15	25	48	24
15	26	24	24
15	27	24	24
15	28	24	24
15	29	24	48
15	30	24	24
15	31	72	72
15	32	24	24
18	1	24	24
18	2	24	24
18	3	24	24
18	4	24	24
18	5	24	24
18	6	24	24
18	7	24	24
18	8	24	24
18	9	24	24
18	10	24	24
18	11	24	24
18	12	72	24
18	13	48	48
18	14	48	48
18	15	48	48
18	16	48	24
18	17	24	24
18	18	48	24
18	19	48	48
18	20	24	48
18	21	24	48
18	22	24	48
18	23	24	24
18	24	24	48
18	25	48	48
18	26	24	48
21	1	72	24
21	2	48	48
21	3	96	96
21	4	48	48
21	5	24	24
21	6	24	48
21	7	48	48
21	8	96	96
21	9	72	48
21	10	72	24
21	11	48	24
21	12	24	24
21	13	24	24
21	14	24	24
21	15	48	48
21	16	48	24
21	17	24	24
21	18	48	48
21	19	48	48
21	20	72	72
21	21	48	48
21	22	72	48
21	23	48	24
24	1	48	24
24	2	24	24
24	3	48	24
24	4	48	48
24	5	24	24
24	6	48	48
24	7	24	48
24	8	48	48
24	9	72	48
24	10	48	48
24	11	48	48
24	12	48	48
24	13	48	48
24	14	48	48
24	15	48	96
24	16	48	72
24	17	48	72
24	18	48	72
24	19	48	48
24	20	72	72
24	21	48	24
24	22	48	24
24	23	96	72
24	24	48	72
24	25	48	48
24	26	96	96
27	1	24	24
27	2	24	48
27	3	24	48
27	4	24	24
27	5	48	24
27	6	24	48
27	7	24	48
27	8	24	24
27	9	24	72
27	10	24	24
27	11	24	48
27	12	24	24
27	13	24	48
27	14	48	24
27	15	24	48
27	16	24	48
27	17	48	24
27	18	48	24
27	19	24	24
27	20	24	24
27	21	24	72
27	22	24	24
30	1	24	48
30	2	24	24
30	3	24	24
30	4	24	24
30	5	72	24
30	6	48	48
30	7	24	48
30	8	24	24
30	9	24	24
30	10	24	24
30	11	24	24
30	12	24	24
30	13	24	48
30	14	24	24
30	15	24	24
30	16	24	24
30	17	24	24
30	18	24	24
30	19	24	24
30	20	48	24
