# Supplementary material for: Thermal requirements, fertility life table and biological parameters of Cleruchoides noackae (Hymenoptera: Mymaridae) at different temperatures
Source: PeerJ. 2023 Mar 13;11:e14911. doi: 10.7717/peerj.14911 (PMC10019329; doi:10.7717/peerj.14911)
Supplement: Supplemental Information 2 [file peerj-11-14911-s002.xlsx]

## Sheet: Capacidade de Parasitismo
		Ovos Parasitados/Horário
Temperature	Replication	24h	48h	72h	96h	120h	Longevity		Total	mean
15	1	5	5	3			72		13	2.90625
15	2	0	2	0			72		2
15	3	0					24		0
15	4	2					24		2
15	5	0	10	0	0		96		10
15	6	0	0				48		0
15	7	0	2	0			72		2
15	8	6					24		6
15	9	5	6	0			72		11
15	10	0					24		0
15	11	6	0				48		6
15	12	1					24		1
15	13	4					24		4
15	14	0	0				48		0
15	15	0	0				48		0
15	16	5	0				48		5
15	17	10					24		10
15	18	0	0	0			72		0
15	19	2	0				48		2
15	20	0					24		0
15	21	7	1	0	0	0	120		8
15	22	8					24		8
15	23	0	0				48		0
15	24	0					24		0
15	25	0	0				48		0
15	26	0					24		0
15	27	0					24		0
15	28	0					24		0
15	29	1					24		1
15	30	0					24		0
15	31	0	1	1			72		2
15	32	0					24		0
18	1	0					24		0	3.42308
18	2	0					24		0
18	3	1					24		1
18	4	0					24		0
18	5	0					24		0
18	6	0					24		0
18	7	5					24		5
18	8	0					24		0
18	9	0					24		0
18	10	10					24		10
18	11	0					24		0
18	12	0	0	0			72		0
18	13	7	1				48		8
18	14	4	1				48		5
18	15	6	3				48		9
18	16	0	0				48		0
18	17	8					24		8
18	18	8	0				48		8
18	19	8	1				48		9
18	20	2					24		2
18	21	0					24		0
18	22	7					24		7
18	23	4					24		4
18	24	5					24		5
18	25	8	0				48		8
18	26	0					24		0
21	1	0	0	0			72		0	5.82609
21	2	9	0				48		9
21	3	5	0	0	3		96		8
21	4	6	2				48		8
21	5	2					24		2
21	6	9					24		9
21	7	9	0				48		9
21	8	7	0	0	0		96		7
21	9	8	0	0			72		8
21	10	9	0	0			72		9
21	11	0	0				48		0
21	12	1					24		1
21	13	1					24		1
21	14	0					24		0
21	15	3	0				48		3
21	16	8	0				48		8
21	17	0					24		0
21	18	7	0				48		7
21	19	5	0				48		5
21	20	1	7	0			72		8
21	21	4	7				48		11
21	22	8	0	0			72		8
21	23	9	4				48		13
24	1	8	0				48		8	7.73077
24	2	7					24		7
24	3	7	0				48		7
24	4	5	0				48		5
24	5	8					24		8
24	6	6	0				48		6
24	7	10					24		10
24	8	7	1				48		8
24	9	10	4	0			72		14
24	10	8	3				48		11
24	11	3	2				48		5
24	12	7	1				48		8
24	13	9	0				48		9
24	14	7	1				48		8
24	15	6	0				48		6
24	16	8	1				48		9
24	17	6	2				48		8
24	18	9	1				48		10
24	19	7	0				48		7
24	20	7	1	0			72		8
24	21	5	0				48		5
24	22	8	0				48		8
24	23	3	0	0	0		96		3
24	24	2	6				48		8
24	25	3	2				48		5
24	26	10	0	0	0		96		10
27	1	7					24		7	5.5
27	2	0					24		0
27	3	0					24		0
27	4	1					24		1
27	5	6	0				48		6
27	6	5					24		5
27	7	0					24		0
27	8	9					24		9
27	9	4					24		4
27	10	7					24		7
27	11	6					24		6
27	12	9					24		9
27	13	7					24		7
27	14	7	0				48		7
27	15	7					24		7
27	16	7					24		7
27	17	8	0				48		8
27	18	10	2				48		12
27	19	7					24		7
27	20	1					24		1
27	21	1					24		1
27	22	10					24		10
30	1	0					24		0	0.45
30	2	0					24		0
30	3	1					24		1
30	4	0					24		0
30	5	1	0	1			72		2
30	6	0	0				48		0
30	7	0					24		0
30	8	1					24		1
30	9	3					24		3
30	10	2					24		2
30	11	0					24		0
30	12	0					24		0
30	13	0					24		0
30	14	0					24		0
30	15	0					24		0
30	16	0					24		0
30	17	0					24		0
30	18	0					24		0
30	19	0					24		0
30	20	0	0				48		0
